# Supplementary material for: Enhanced upconversion luminescence and modulated paramagnetic performance in NaGdF4:Yb, Er by Mg2+ tridoping
Source: Royal Society of Chemistry journal article supplement (doi:10.1039/c6ra13711c), 2016-01-01
Supplement: c6ra13711c1.pdf [file c6ra13711c1.pdf]

# Electronic Supplementary Information

## Enhanced upconversion luminescence and modulated paramagnetic performance in NaGdF<sub>4</sub>: Yb, Er by Mg<sup>2+</sup> tridoping

Shuwen Zhao,<sup>a</sup> Wei Liu,<sup>b</sup> Xianya xue,<sup>c</sup> Yushi Yang,<sup>c</sup> Zhiyong Zhao,<sup>d</sup> Youfa Wang,<sup>\*c</sup> Bin Zhou<sup>\*a</sup>

<sup>a</sup> School of Materials Science and Engineering, Wuhan University of Technology, Wuhan 430070, P. R. China.

<sup>b</sup> School of Foreign Languages, Central China Normal University, Wuhan 430079, P. R. China.

<sup>c</sup> State Key Laboratory of Advanced Technology for Materials Synthesis and Processing, Wuhan University of Technology, Wuhan 430070, P. R. China.

<sup>d</sup> State Key Laboratory of Silicate Materials for Architectures, Wuhan University of Technology, Wuhan 430070, P. R. China.

\*Corresponding author. E-mail address: wangyoufa@whut.edu.cn; a971681537@whut.edu.cn.

Table S1 Nominal and ICP-AES results of cation mole ratios in the products

| NaGd <sub>(0.78-x)</sub> F <sub>4</sub> : 20%Yb,<br>2%Er, xMg | Na:Gd:Yb:Er:Mg                 |                                   |
|---------------------------------------------------------------|--------------------------------|-----------------------------------|
|                                                               | Nominal ratio                  | ICP-AES result                    |
| x=0                                                           | 1.000:0.778:0.199:0.023        | 1.010: 0.778: 0.193: 0.019        |
| x=3%                                                          | 1.000:0.747:0.202:0.020:0.031  | 1.007: 0.770: 0.183:0.018: 0.039  |
| x=7%                                                          | 1.000:0.705::0.204:0.021:0.070 | 1.000: 0.719: 0.186: 0.018: 0.077 |
| x=13.5%                                                       | 1.000:0.638:0.205:0.022:0.135  | 1.006: 0.637: 0.186: 0.018: 0.159 |
| x=25%                                                         | 1.000:0.530:0.200:0.024:0.246  | 1.006: 0.523: 0.185: 0.019: 0.273 |
| x=40%                                                         | 1.000:0.354:0.207:0.023:0.416  | 1.057: 0.268: 0.200: 0.024: 0.508 |

As shown in Table S1, with increasing of Mg<sup>2+</sup> doping concentrations in NaGdF<sub>4</sub>, the molar percentages of Gd reduces gradually, and the value of Gd/Mg ratio is slightly lower than the nominal one, whereas Na/Yb/Er contents almost keep unchanged. These results confirmed the incorporation of Mg<sup>2+</sup> into NaGdF<sub>4</sub> by substituting Gd<sup>3+</sup> site and locating in interval position partially. When the value of x up to 40 mol%, due to the generation of NaMgF<sub>3</sub> phase, this can make the change of stoichiometry.

Table S2 Refined lattice constants of as-synthesized  $\text{NaGd}_{(0.78-x)}\text{F}_4$ : 20%Yb, 2%Er, xMg UCNCs

| Value                        | x           |             |             |             |             |             |
|------------------------------|-------------|-------------|-------------|-------------|-------------|-------------|
|                              | 0%          | 3%          | 7%          | 13.5%       | 25%         | 40%         |
| a=b<br>(Å)                   | 6.03923(23) | 6.04065(30) | 6.03747(22) | 6.03168(25) | 6.02649(21) | 6.01200(16) |
| c (Å)                        | 3.57906(14) | 3.57920(20) | 3.57810(21) | 3.57064(17) | 3.56501(17) | 3.54382(13) |
| Volum<br>e (Å <sup>3</sup> ) | 113.0476    | 113.1060    | 112.9514    | 112.5000    | 112.1296    | 110.9274    |

Table S3 R-values and  $\chi^2$  of structure refined with the Rietveld method of six different  $\text{Mg}^{2+}$  doping concentration samples.

| $\text{NaGd}_{(0.78-x)}\text{F}_4$ :<br>20%Yb, 2%Er, xMg | Rp/% | Rwp/% | $\chi^2$ |
|----------------------------------------------------------|------|-------|----------|
| x=0                                                      | 3.86 | 4.84  | 1.328    |
| x=3%                                                     | 3.96 | 5.03  | 1.308    |
| x=7%                                                     | 4.25 | 5.36  | 1.301    |
| x=13.5%                                                  | 4.56 | 5.76  | 1.288    |
| x=25%                                                    | 4.72 | 5.97  | 1.398    |
| x=40%                                                    | 4.69 | 5.99  | 1.554    |

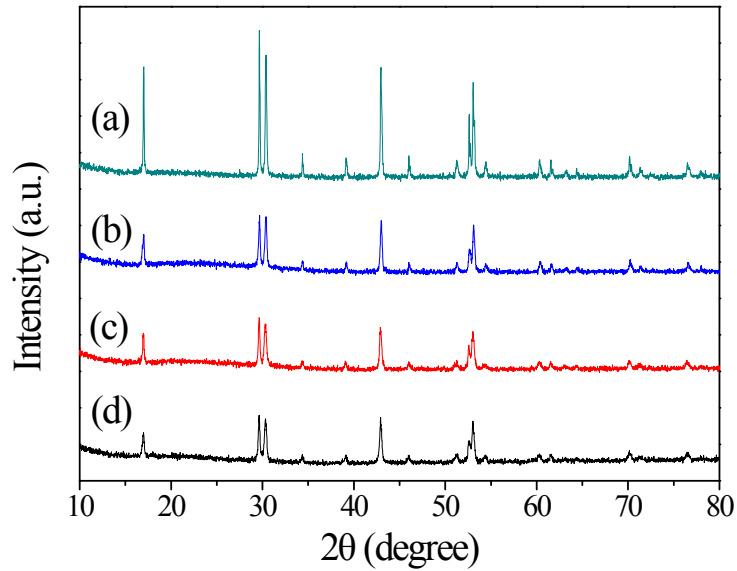

Figure S1 XRD patterns of 35%  $\text{Mg}^{2+}$ -doped  $\text{NaGdF}_4$ : 20% $\text{Yb}^{3+}$ , 2% $\text{Er}^{3+}$  at different times of Mg impurity injection. (a) 0 min, (b) 10 min, (c) 20 min, (d) 30 min. The unit length of intensity is fixed.

Experimental procedure: powder A (the mixture of  $\text{Gd}_2\text{O}_3$ ,  $\text{Yb}_2\text{O}_3$ ,  $\text{Er}_2\text{O}_3$  and

NaOH) and powder B (MgO) were separately dissolved into the solution of  $\text{CF}_3\text{COOH}$ /deionized water and evaporated. Both powders were dissolved into OA and ODE at 150 °C for 30 min. The solution (from powder A) was injected into 320 °C of the mixture solution of OA and ODE, then the solution (from powder B) was injected into previous solution after 0 min, 10 min, 20 min, and 30 min respectively. Additionally, the injection time of 0 min was prepared in a similar fashion of  $\text{NaGdF}_4$ : Yb/Er/Mg nanocrystals (experimental section) *via* adjusting the quantities of MgO.

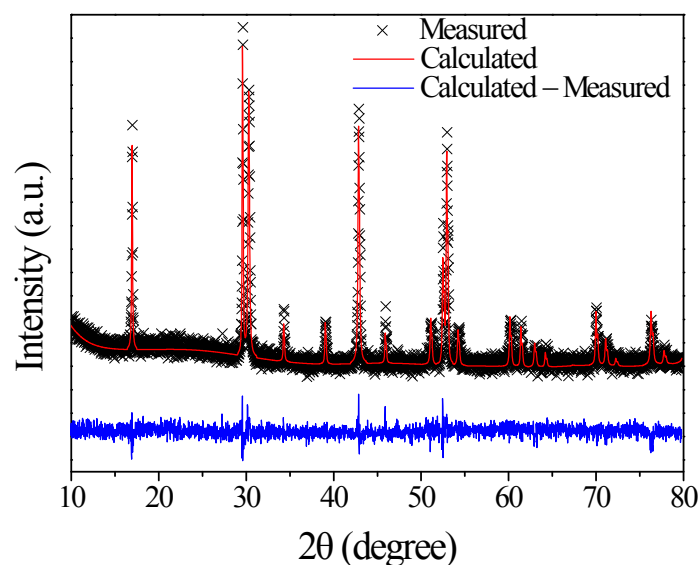

Figure S2 Rietveld fit of  $\text{NaGdF}_4$ : 20% $\text{Yb}^{3+}$ , 2% $\text{Er}^{3+}$ , 13.5% $\text{Mg}^{2+}$  sample was shown as an example.

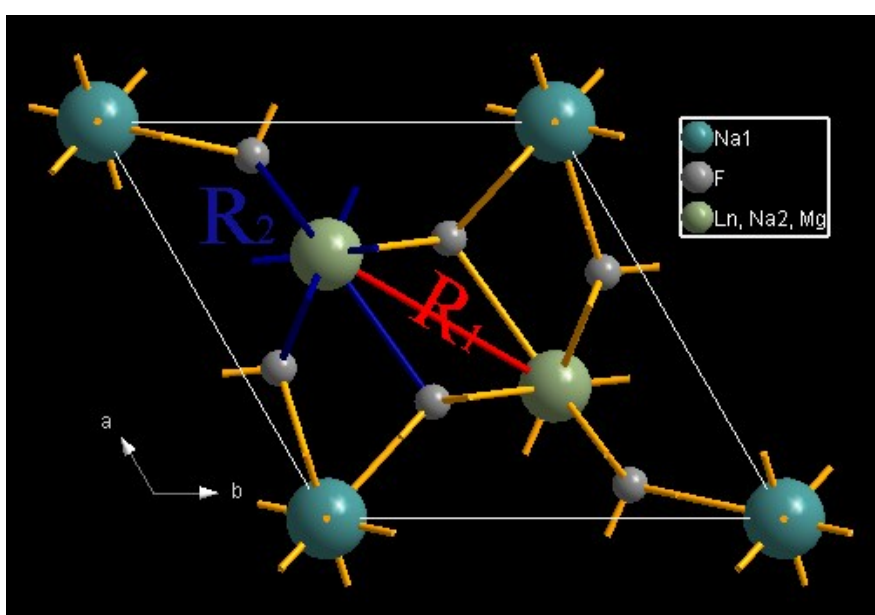

Figure S3 Crystal structure diagrammatic sketches.  $R_1$  is the distance between Ln-Ln,

$R_2$  is the average bond length of Ln-F.

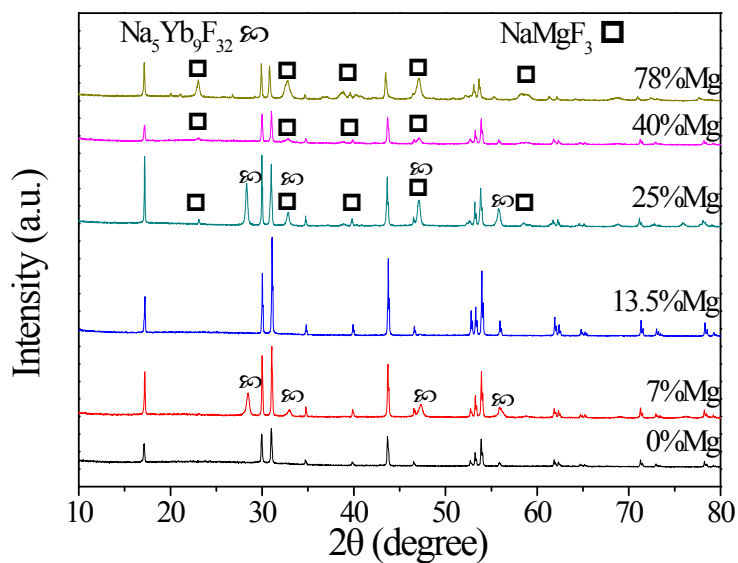

Figure S4 XRD patterns of as-prepared  $\text{NaYb}_{(0.98-y)}\text{F}_4$ : 2%  $\text{Er}^{3+}$ ,  $y\text{Mg}^{2+}$  samples,  $y=0$ , 7 mol%, 20 mol%, 25 mol%, 40 mol%, 78 mol%.

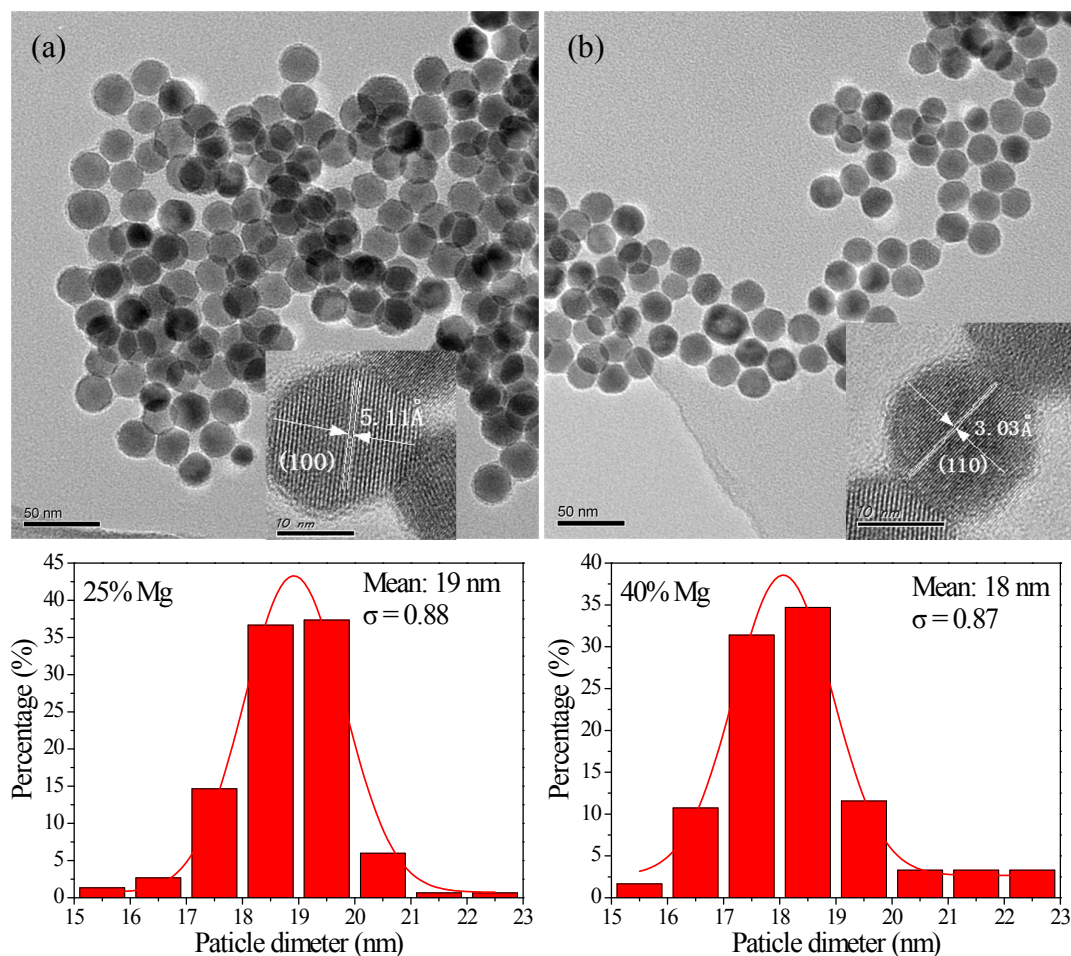

Figure S5 TEM images and corresponding size distribution of 25 mol% (a) and 40 mol% (b)  $\text{Mg}^{2+}$ -doped  $\text{NaGdF}_4$ :20% $\text{Yb}^{3+}$ , 2% $\text{Er}^{3+}$  nanocrystals. The insets are the

corresponding HRTEM images.

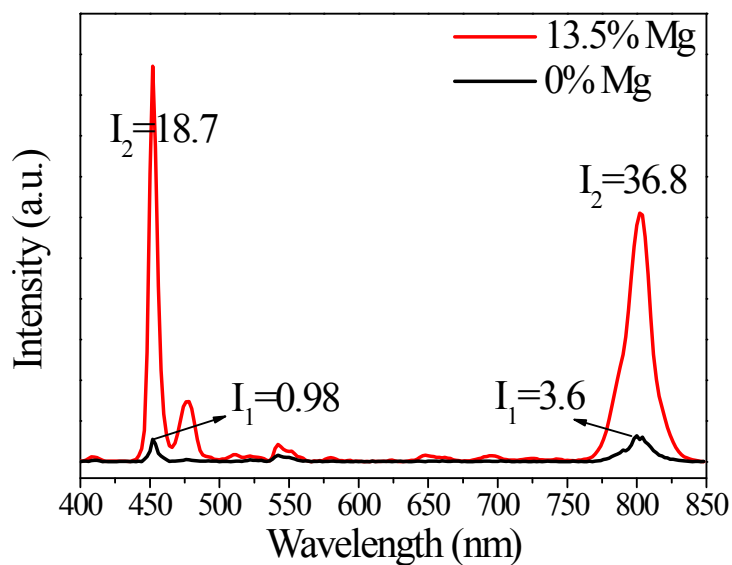

Figure S6 Upconversion emission spectra of  $\text{Mg}^{2+}$ -free and 13.5 mol%  $\text{Mg}^{2+}$ -doped  $\text{NaGdF}_4: 20\% \text{Yb}^{3+}, 2\% \text{Tm}^{3+}$ .  $I_1$  and  $I_2$  are the integral emission intensities of  $\text{Mg}^{2+}$ -free and  $\text{Mg}^{2+}$ -doped at 800 and 452 nm, respectively.

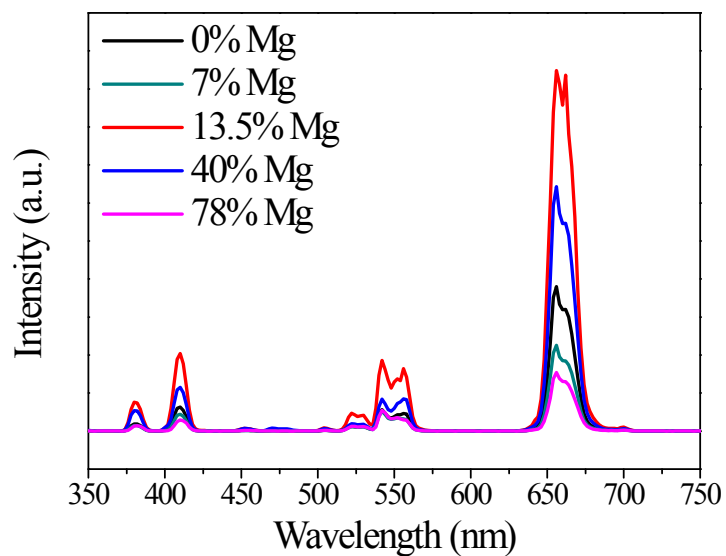

Figure S7 Upconversion emission spectra of  $\text{NaYbF}_4: 2\% \text{Er}^{3+}, y\text{Mg}^{2+}$ ,  $y = 0, 7, 13.5, 40$  and  $78$  mol%.

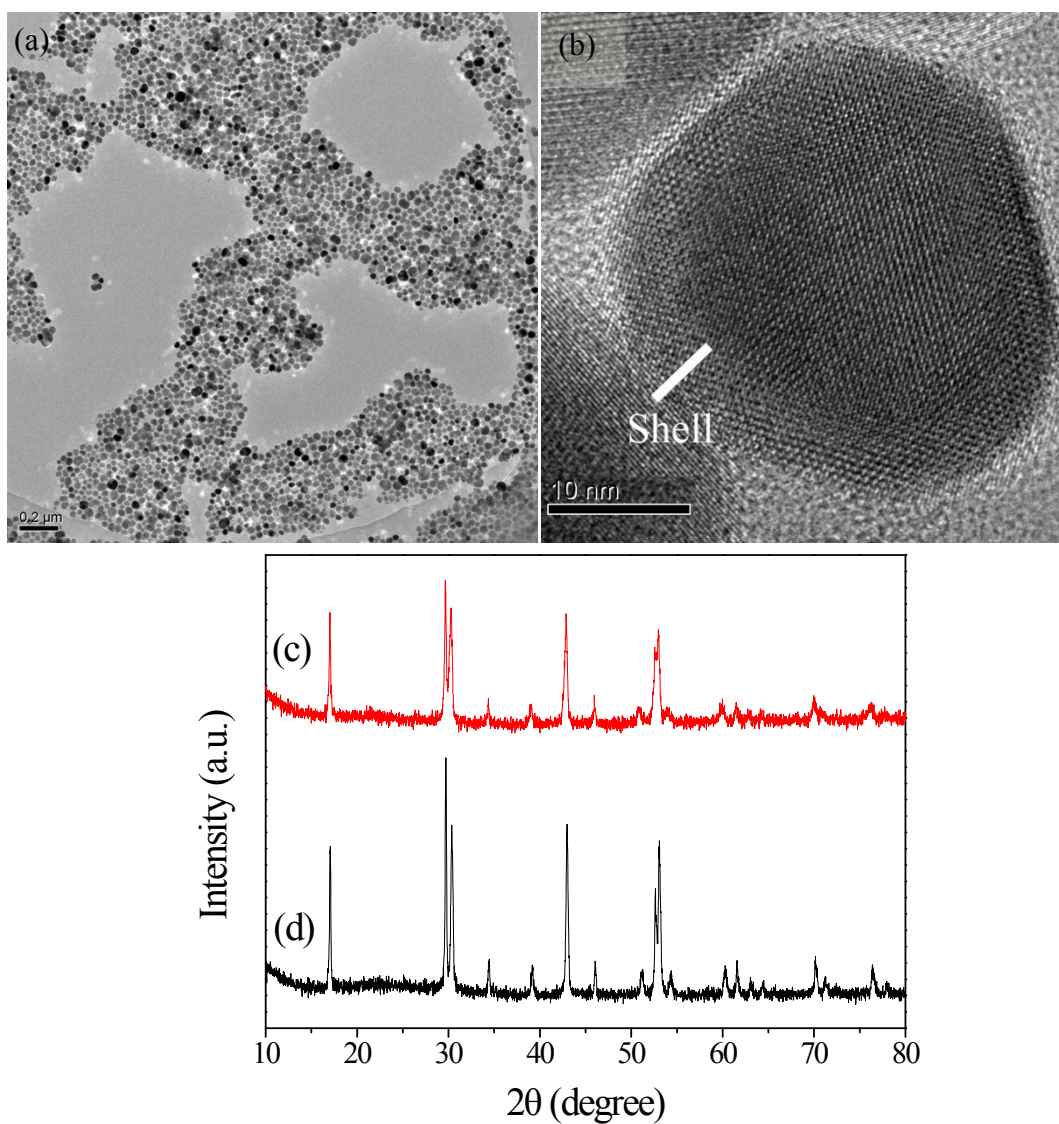

Figure S8 TEM (a), HRTEM (b) and XRD (c) of core-shell ( $\text{NaGdF}_4$ : 20% $\text{Yb}^{3+}$ , 2% $\text{Er}^{3+}$ @ $\text{NaGdF}_4$ ). Core-shell UCNCs were prepared by the growth of  $\text{NaGdF}_4$  shell according to the fabrication route of  $\text{Mg}^{2+}$ -doped core-shell (experimental section). XRD pattern of  $\text{Mg}^{2+}$ -doped core-shell was shown in (d). XRD patterns (c and d) indicate that the  $\text{NaGdF}_4$  shells are of hexagonal-phase  $\text{NaGdF}_4$ .



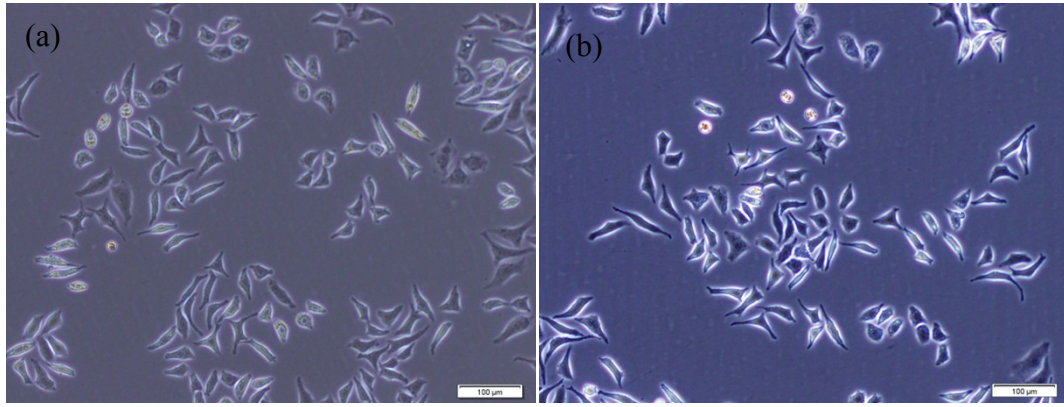

Figure S9 Cell microphotographs of (a) contrast group and (b)  $0.1 \text{ mg}\cdot\text{mL}^{-1}$  water-soluble Mg-doped UCNCs after incubation for 24 h.
